# Supplementary material
Source: PubMed Central journal article supplement (PMC6944914)
Supplement: EMBR-21-e47882-s001.pdf [file EMBR-21-e47882-s001.pdf]

# **Schistosomal extracellular vesicle-enclosed miRNAs modulate host T helper cell differentiation**

## **Contents of Appendix files**

| <b>Appendix file</b>                   | <b>Title</b>                                                                                                                                                     | <b>page</b> |
|----------------------------------------|------------------------------------------------------------------------------------------------------------------------------------------------------------------|-------------|
| Appendix Figure S1                     | Predicted cellular component of the identified proteins in the proteomics by GO Ontology analysis software                                                       | 2           |
| Appendix Figure S2                     | images of uptake of EVs by CD4 cells                                                                                                                             | 3           |
| Appendix Figure S3                     | Detection of miR-10 and Bantam in the same fractions with the schistosomal-EVs density sucrose gradient.                                                         | 4           |
| Appendix Figure S4                     | Uptake of schistosomal-labeled EVs and schistosomal-miRNAs by Jurkat cells                                                                                       | 5           |
| Appendix Figure S5                     | Schistosoma miR-10 putative targets analysis                                                                                                                     | 6           |
| Appendix Figure S6                     | Three Western blot assays, using anti-MAP3K7 or GAPDH antibodies, for protein extracts from Th cells that were either exposed or not exposed to the Schistosomes | 7           |
| Appendix Figure S7                     | Three Western blot assays, using anti-MAP3K7 or GAPDH antibodies, for protein extracts from Jurkat cells overexpressing miR-10 or control plasmid                | 7           |
| Appendix Table S1:                     | FunRich bioinformatic analysis of the distribution of the identified schistosomal-proteins in cellular components.                                               | 8           |
| Appendix Table S2                      | Genes that were downregulated in the presence of Schistosomes, and are known to be regulated by NF- $\kappa$ B.                                                  | 9           |
| Appendix Table S3                      | Genes that were downregulated in the presence of Schistosomes and are known as NF- $\kappa$ B activators                                                         | 10          |
| References to appendix table S2 and S3 |                                                                                                                                                                  | 10-12       |

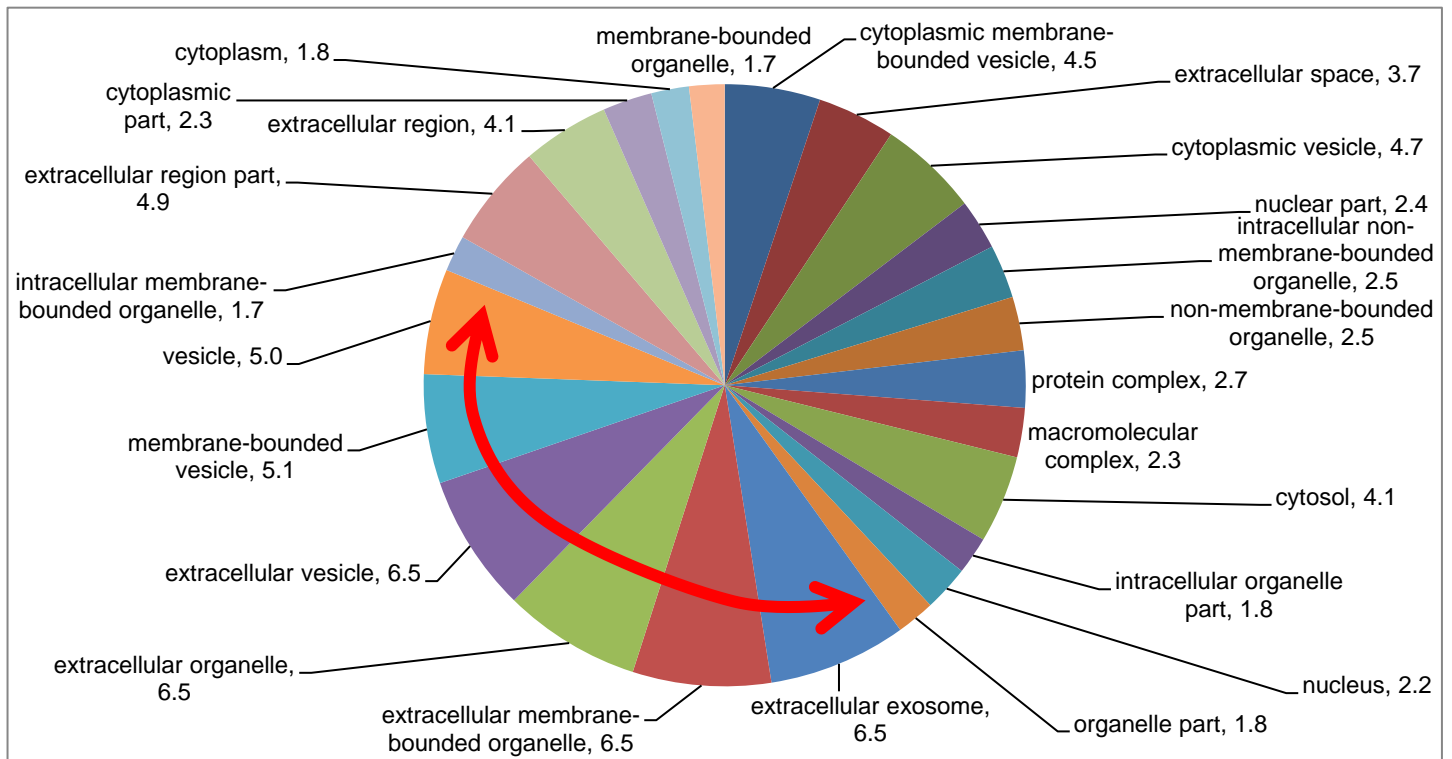

**Appendix Figure S1: predicted cellular component of the identified proteins in the proteomics by GO Ontology analysis software.** Only results with  $P < 0.05$  (calculated by Bonferroni correction for multiple testing) are displayed. Only cellular components that were predicted to have more than 3 proteins are displayed. The numbers present the fold enrichment. The red arrow indicates organelles that are extracellular vesicles.

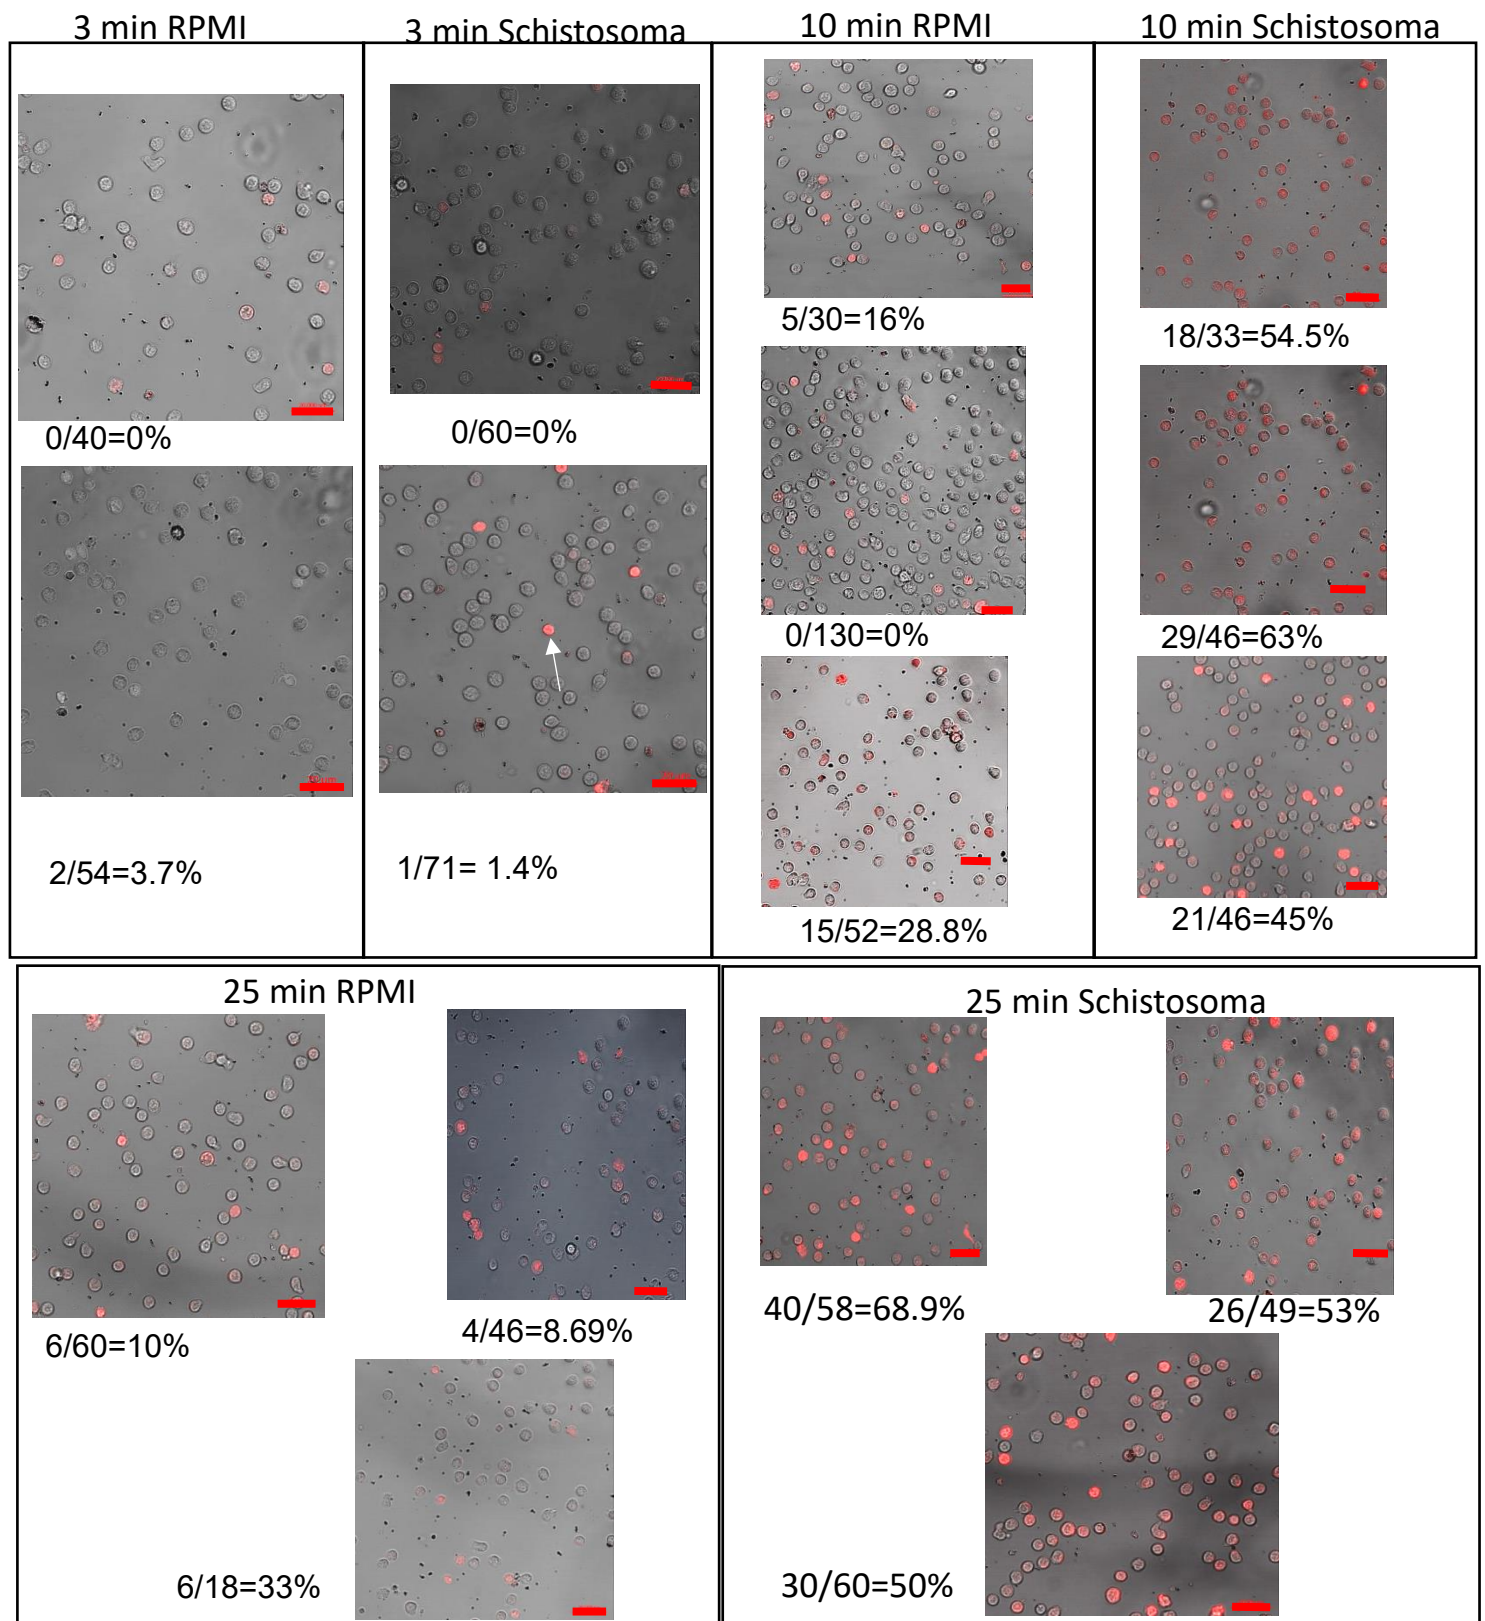

**Appendix Figure S2:** images of uptake of EVs by CD4 cells, in each image the calculation of percentage of labeled cells in a taken image is shown. The red line represent of  $20\mu\text{m}$ .

The EVs were stain with Thiazole Orange as written in the Materials and Methods. To avoid a high background staining, after the labeling, the EVs were washed in  $\sim 70$  ml RPMI. Still there are traces of non-EVs color residues in the control that probably stained cells with a defective cytoplasmatic membrane that looks totally different from EV-staining cells. Obviously, these cells were not counted (the white arrow that is shown in image 3 min Schistosoma lower image mark example of none specific staining).

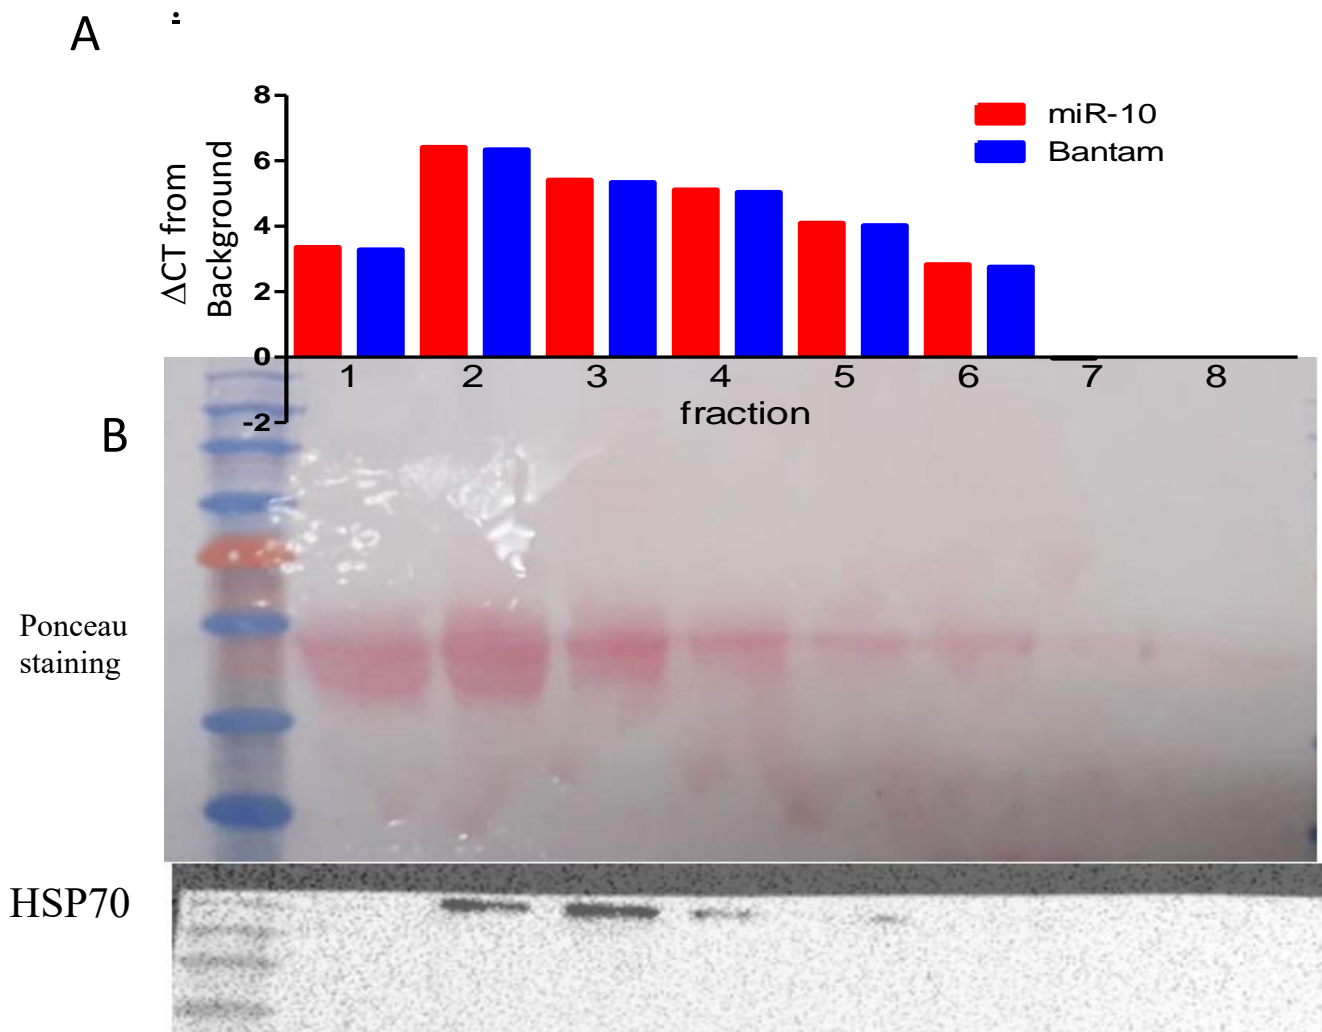

**Appendix Figure S3: Detection of miR-10 and Bantam in the same fractions with the schistosomal-EVs in density sucrose gradient** EVs were isolated from 100ml Schistosomal growing medium. The EVs were concentrated into 500 $\mu$ l of PBS, then loaded onto the top OptiPrep™ density sucrose gradient (see Methods). After centrifugation, 8 fractions of 1ml were collected (from top to bottom). From each fraction, RNA and proteins were extracted and subjected to: A) qRT-PCR using specific primers to Schistosomal-miRNAs, Bantam and miR-10-5p. B) Ponceau staining and Western blot analysis using anti-human HSP70 antibodies (since there are no available antibodies recognizing any Schistosomal-EV proteins, and the identity between human and Schistosomal-hsp-70 is 83%).

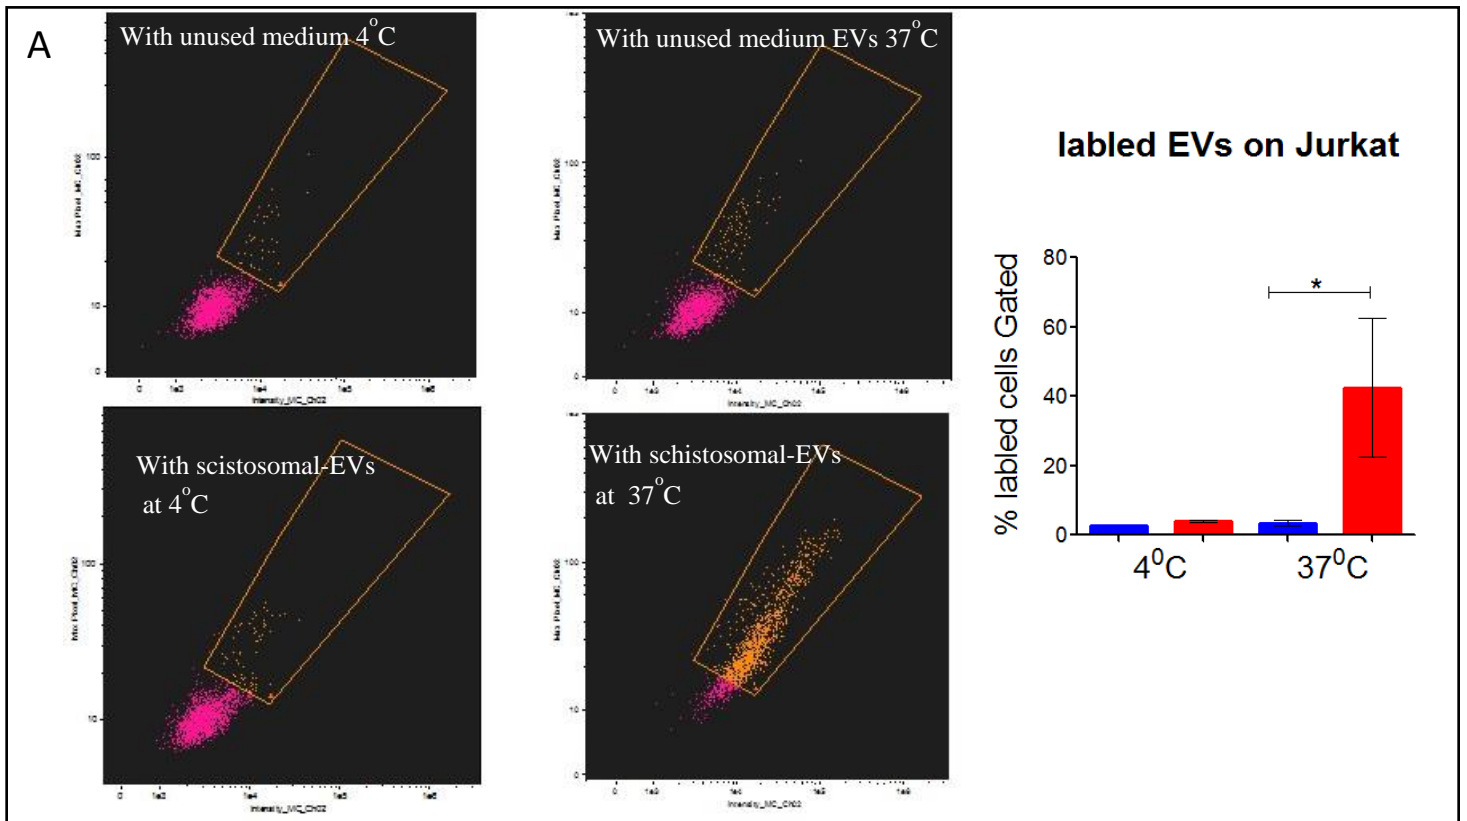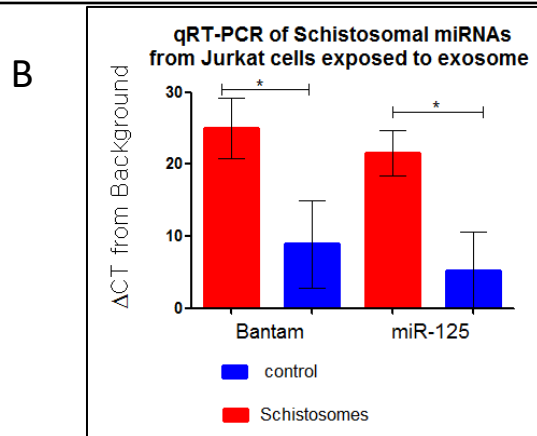

**Appendix Figure S4: Uptake of schistosomal-labeled EVs and schistosomal-miRNAs by Jurkat cells.** **A)** EVs were purified from culture medium where the Schistosomes grew in or from fresh unused medium. Both were stained using Thiazole Orange.  $\sim 5 \times 10^6$  purified EVs were incubated with  $1 \times 10^6$  cells for 10min at 37°C or 4°C. EV-uptake was detected by image stream flow cytometry (IFC). The mean  $\pm$  SEM was calculated from 3 independent experiments. Statistics were performed using Mann Whitney t-test ( $*p < 0.05$ ). **B)**  $\sim 5 \times 10^6$  purified EVs were added to  $1 \times 10^6$  Jurkat cells for 48h. RNA was extracted and subjected to qRT-PCR with specific primers to Schistosomal-miR-Bantam or schistosomal-miR-125. The data are presented as the delta Ct from average control background. The mean  $\pm$  SEM was calculated from 3 independent experiments. Statistics were performed using Unpaired t-test with Welch's correction ( $*p < 0.05$ )

A

|                                    |                                  |
|------------------------------------|----------------------------------|
| Position 826-832 of TNFSF4 3' UTR  | 5' ...GGGAACUGGACAUCUCAGGGUAA... |
| <i>Schistosoma</i> miR-10a-5p      | 3' GGUUUGAGCCCAGAUGUCCCAA<br>    |
| Position 2274-2280 of CCL22 3' UTR | 5' ...GCUGGUGCCGCUCUCAGGGUAA...  |
| <i>Schistosoma</i> miR-10a-5p      | 3' GGUUUGAGCCCAGAUGUCCCAA<br>    |
| Position 236-242 of GATA3 3' UTR   | 5' ..CAUAUCCCCUAUUUAACAGGGUC...  |
| <i>hsa-miR-10a-5p</i>              | 3' GGUUUGAGCCCAGAUGUCCCAA<br>    |

B

**Effect of miR-10 on putative targets**

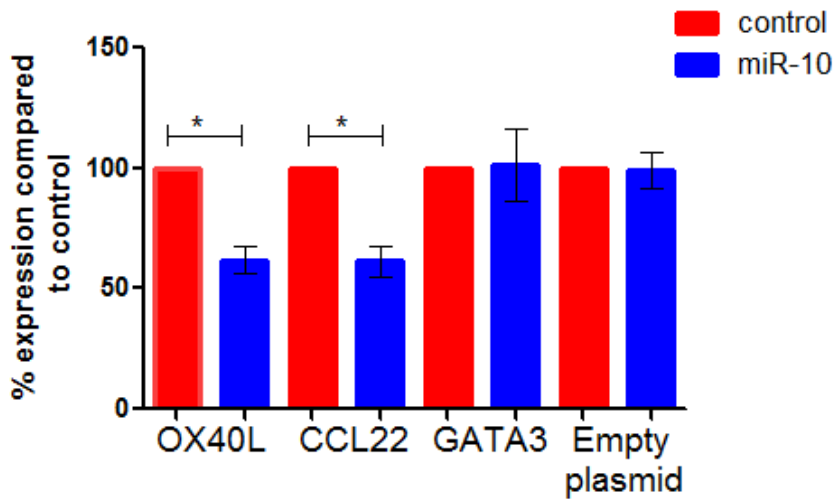

**Appendix Figure S5: Schistosoma miR-10 putative targets analysis** A) The putative binding sites of miR-10 on *OX40L* (TNFSF4), *CCL22* and *GATA3* 3' UTR are shown (taken from TargetScan at [http://www.targetscan.org/vert\\_72/](http://www.targetscan.org/vert_72/)). (B) Human Jurkat cells stably expressing Schistosomal-miR-10 were transfected with either psiCHECK-II vector (empty plasmid), psiCHECK-OX40L-3'UTR-luciferase, psiCHECK-II-CCL22-3'UTR-luciferase or psiCHECK-II-GATA3-3'UTR-luciferase. 24h after transfection the cells lysates were subjected to luciferase assay. The results are presented as the ratio of expression of renilla/luciferase that was normalized relative to Jurkat cell transfected with control vector not expressing miR-10. Values are expressed as the mean+SD of at least 3 independent experiments. Statistics were performed using t-test \*p<0.05.

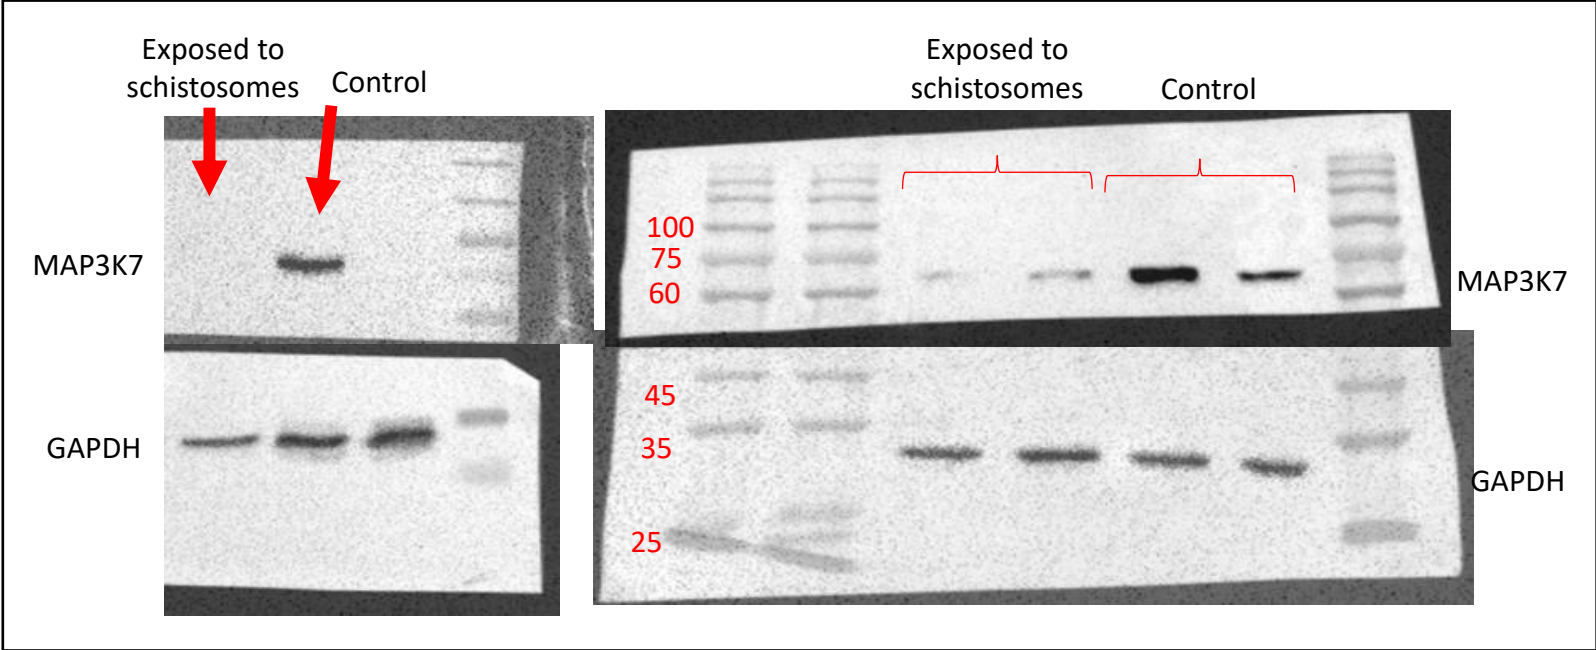

**Appendix Figure S6:** Three Western blot assays, using anti-MAP3K7 or GAPDH antibodies, for protein extracts from Th cells that were either exposed or not exposed to the Schistosomes.

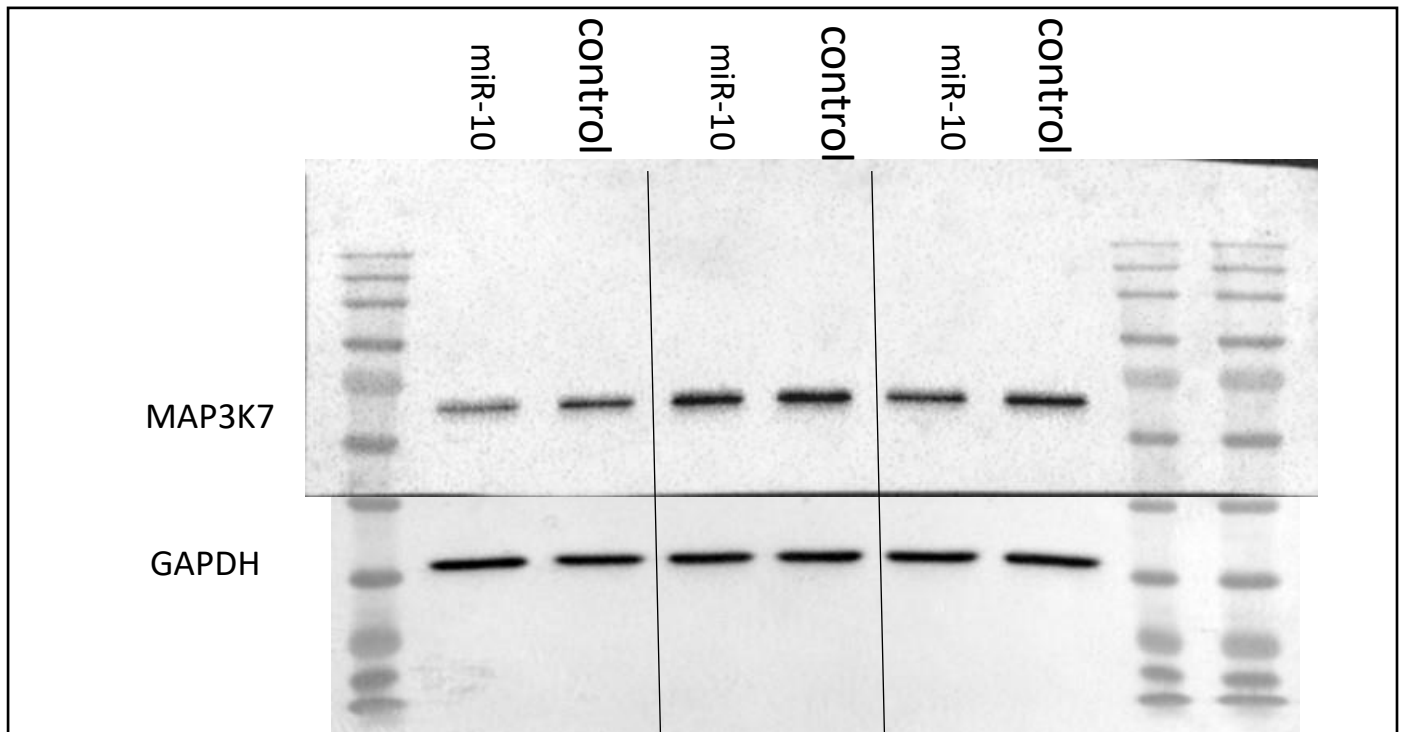

**Appendix Figure S7:** Three Western blot assays, using anti-MAP3K7 or GAPDH antibodies, for protein extracts from Jurkat cells overexpressing miR-10 or control plasmid

**Appendix Table S1:** FunRich bioinformatic analysis of the distribution of the identified schistosomal-proteins in cellular components

| Cellular component                                 | No. of proteins out of the 59 proteins mapped to the specific cellular component * | Expected Percentage of proteins in specific cellular component out of the data set of 28328 proteins display | Percentage of protein found in our proteomics | Corrected p-value ** |
|----------------------------------------------------|------------------------------------------------------------------------------------|--------------------------------------------------------------------------------------------------------------|-----------------------------------------------|----------------------|
| Exosomes                                           | 45                                                                                 | <b>7.1</b>                                                                                                   | <b>76.27</b>                                  | 1.71E-25             |
| Lysosome                                           | 33                                                                                 | 19.88                                                                                                        | 55.93                                         | 3.35E-15             |
| Centrosome                                         | 19                                                                                 | 5.7                                                                                                          | 32.20                                         | 1.64E-10             |
| Cytoplasm                                          | 45                                                                                 | 20.4                                                                                                         | 76.27                                         | 3.62E-07             |
| Cytosol                                            | 19                                                                                 | 2.2                                                                                                          | 32.20                                         | 5.109E-06            |
| Proteasome complex                                 | 4                                                                                  | 4.1                                                                                                          | 6.78                                          | 0.000581             |
| Intracellular ferritin complex                     | 2                                                                                  | 12.2                                                                                                         | 3.39                                          | 0.000891             |
| Proteasome core complex                            | 2                                                                                  | 4.42                                                                                                         | 3.39                                          | 0.0053               |
| Microtubule                                        | 5                                                                                  | 6.38                                                                                                         | 8.47                                          | 0.00911              |
| Perinuclear region                                 | 5                                                                                  | 4.3                                                                                                          | 8.47                                          | 0.01053              |
| Mitochondrion                                      | 14                                                                                 | 1.5                                                                                                          | 23.72                                         | 0.0226               |
| Cytoskeleton                                       | 7                                                                                  | 0.45                                                                                                         | 11.86                                         | 0.091                |
| Nucleolus                                          | 12                                                                                 | 0.46                                                                                                         | 20.34                                         | 0.195                |
| Nucleosome                                         | 2                                                                                  | 3.9                                                                                                          | 3.39                                          | 0.251                |
| Nucleus                                            | 33                                                                                 | 0.12                                                                                                         | 55.93                                         | 0.524                |
| Eukaryotic translation elongation factor 1 complex | 1                                                                                  | 1.23                                                                                                         | 1.69                                          | 0.66                 |

\*Out of 84 proteins presented in FunRich analysis software, 59 could be mapped to a specific predicted cellular component. In the table are displayed cellular component with more than 1.5% of the 59 proteins \*\* (Bonferroni method).



| <b>Appendix Table S2: Genes that were downregulated in the presence of Schistosomes, and are known to be regulated by NF-<math>\kappa</math>B.</b> |                                        |                   |           |  |
|----------------------------------------------------------------------------------------------------------------------------------------------------|----------------------------------------|-------------------|-----------|--|
| Gene symbol                                                                                                                                        | Fold change<br>Schistosoma/<br>control | P value<br>t-test | Reference |  |
| Mmp7                                                                                                                                               | 0.036                                  | 5.8685E-06        | (1, 2)    |  |
| Pld1                                                                                                                                               | 0.037                                  | 6.60044E-06       | (3)       |  |
| Olr1                                                                                                                                               | 0.085                                  | 0.00021079        | (4)       |  |
| Ngb                                                                                                                                                | 0.085                                  | 0.00021079        | (5)       |  |
| Plcb1                                                                                                                                              | 0.149                                  | 0.002303683       | (6)       |  |
| Aire                                                                                                                                               | 0.198                                  | 0.003921811       | (7)       |  |
| Serpine2                                                                                                                                           | 0.307                                  | 0.000703478       | (8)       |  |
| Cx3cr1                                                                                                                                             | 0.318                                  | 0.006648255       | (9)       |  |
| Mmp10                                                                                                                                              | 0.425                                  | 3.22662E-05       | (10)      |  |
| Alpl (TNAP)                                                                                                                                        | 0.476                                  | 0.000848196       | (11)      |  |
| IL-10                                                                                                                                              | 0.477                                  | 0.000753686       | (12)      |  |
| Tnfsf4 (OX40L)                                                                                                                                     | 0.483                                  | 0.00358029        | (13)      |  |
| Spp1<br>(osteopontin)                                                                                                                              | 0.484                                  | 0.007954298       | (14)      |  |
| Aqp9 (aquaporin<br>9)                                                                                                                              | 0.490                                  | 0.010170549       | (15)      |  |
| Prkcdbp                                                                                                                                            | 0.491                                  | 0.029094084       | (16)      |  |
| Ccl22                                                                                                                                              | 0.505                                  | 0.020326852       | (17)      |  |
| Lhx2                                                                                                                                               | 0.513                                  | 0.024820865       | (18)      |  |
| Cxcl2                                                                                                                                              | 0.523                                  | 0.034296724       | (19)      |  |
| IL-2                                                                                                                                               | 0.537                                  | 0.03103846        | (20)      |  |
| Clspn (Claspin)                                                                                                                                    | 0.552                                  | 0.000417044       | (21)      |  |
| Pax6                                                                                                                                               | 0.565                                  | 0.002198222       | (22)      |  |
| Inhba (activin)                                                                                                                                    | 0.565                                  | 0.002289994       | (23)      |  |
| S100a6                                                                                                                                             | 0.587                                  | 0.000947966       | (24)      |  |
| IL-13                                                                                                                                              | 0.588                                  | 0.005429866       | (25)      |  |
| Ccne1(cyclin E1)                                                                                                                                   | 0.615                                  | 0.001209538       | (26)      |  |
| Arg2(arginase II)                                                                                                                                  | 0.620                                  | 0.041714036       | (27)      |  |
| Cd80 (B7.1)                                                                                                                                        | 0.621                                  | 0.04309922        | (28)      |  |
| Crmp1                                                                                                                                              | 0.644                                  | 0.017272692       | (29)      |  |
| IL-4                                                                                                                                               | 0.654                                  | 0.003695783       | (30)      |  |

| <b>Appendix Table S3: Genes that were downregulated in the presence of Schistosomes and are known as NF-<math>\kappa</math>B activators</b> |                                     |                   |           |
|---------------------------------------------------------------------------------------------------------------------------------------------|-------------------------------------|-------------------|-----------|
| Gene symbol                                                                                                                                 | Fold change<br>Schistosoma/ control | P value<br>t-test | Reference |
| Matn2                                                                                                                                       | 0.059                               | 4.67284E-05       | (31)      |
| Mapk15                                                                                                                                      | 0.105                               | 0.000518879       | (32)      |
| Nos1                                                                                                                                        | 0.156                               | 0.000278261       | (33)      |
| Hspb2                                                                                                                                       | 0.178                               | 0.004999194       | (34)      |
| Plce1                                                                                                                                       | 0.237                               | 0.00054487        | (35)      |
| Ch25h                                                                                                                                       | 0.289                               | 0.034860576       | (36)      |
| Hmga2                                                                                                                                       | 0.372                               | 0.014173237       | (37)      |
| Egf                                                                                                                                         | 0.383                               | 0.016443394       | (38)      |
| Ripk4                                                                                                                                       | 0.403                               | 0.00109687        | (39)      |
| Pth                                                                                                                                         | 0.404                               | 0.000371483       | (40)      |
| Fgfr2                                                                                                                                       | 0.437                               | 0.019419708       | (41)      |
| Ffar2                                                                                                                                       | 0.556                               | 0.025468136       | (42)      |
| Rrm2                                                                                                                                        | 0.569                               | 0.00041276        | (43)      |
| Il5ra                                                                                                                                       | 0.615                               | 0.026085869       | (44)      |
| Prlr                                                                                                                                        | 0.616                               | 0.016251622       | (45)      |
| Setd6                                                                                                                                       | 0.658                               | 0.02201673        | (46)      |

#### References to appendix table S2 and S3

1. Guan PP, et al. (2015) By activating matrix metalloproteinase-7, shear stress promotes chondrosarcoma cell motility, invasion and lung colonization. *Oncotarget* 6(11):9140-9159.
2. Liu JY, et al. (2017) Solute carrier family 12 member 5 promotes tumor invasion/metastasis of bladder urothelial carcinoma by enhancing NF-kappaB/MMP-7 signaling pathway. *Cell death & disease* 8(3):e2691.
3. Kang DW, et al. (2008) Phorbol ester up-regulates phospholipase D1 but not phospholipase D2 expression through a PKC/Ras/ERK/NFkappaB-dependent pathway and enhances matrix metalloproteinase-9 secretion in colon cancer cells. *J Biol Chem* 283(7):4094-4104.
4. Wang B, et al. (2017) Up-regulation of OLR1 expression by TBC1D3 through activation of TNFalpha/NF-kappaB pathway promotes the migration of human breast cancer cells. *Cancer Lett* 408:60-70.
5. Liu N, et al. (2012) Transcriptional regulation mechanisms of hypoxia-induced neuroglobin gene expression. *The Biochemical journal* 443(1):153-164.
6. Atef ME & Anand-Srivastava MB (2014) Enhanced expression of Gqalpha and PLC-beta1 proteins contributes to vascular smooth muscle cell hypertrophy in SHR: role of endogenous angiotensin II and endothelin-1. *Am J Physiol Cell Physiol* 307(1):C97-106.
7. Haljasorg U, et al. (2015) A highly conserved NF-kappaB-responsive enhancer is critical for thymic expression of Aire in mice. *Eur J Immunol* 45(12):3246-3256.
8. Suzuki S, et al. (2006) Identification of TNF-alpha-responsive NF-kappaB p65-binding element in the distal promoter of the mouse serine protease inhibitor SerpinE2. *FEBS letters* 580(13):3257-3262.
9. Xiao LJ, et al. (2012) Hypoxia increases CX3CR1 expression via HIF-1 and NFkappaB in androgen-independent prostate cancer cells. *International journal of oncology* 41(5):1827-1836.
10. Rothgiesser KM, Fey M, & Hottiger MO (2010) Acetylation of p65 at lysine 314 is important for late NF-kappaB-dependent gene expression. *BMC genomics* 11:22.

11. Henaut L, et al. (2016) TWEAK favors phosphate-induced calcification of vascular smooth muscle cells through canonical and non-canonical activation of NF-kappaB. *Cell death & disease* 7:e2305.
12. Liu YW, Chen CC, Tseng HP, & Chang WC (2006) Lipopolysaccharide-induced transcriptional activation of interleukin-10 is mediated by MAPK- and NF-kappaB-induced CCAAT/enhancer-binding protein delta in mouse macrophages. *Cell Signal* 18(9):1492-1500.
13. Arima K, et al. (2010) Distinct signal codes generate dendritic cell functional plasticity. *Science signaling* 3(105):ra4.
14. Partridge CR, He Q, Brun M, & Ramos KS (2008) Genetic networks of cooperative redox regulation of osteopontin. *Matrix Biol* 27(5):462-474.
15. Aharon R & Bar-Shavit Z (2006) Involvement of aquaporin 9 in osteoclast differentiation. *J Biol Chem* 281(28):19305-19309.
16. Lee JH, et al. (2011) Epigenetic alteration of PRKCDBP in colorectal cancers and its implication in tumor cell resistance to TNFalpha-induced apoptosis. *Clin Cancer Res* 17(24):7551-7562.
17. Poole E, et al. (2008) NF-kappaB-mediated activation of the chemokine CCL22 by the product of the human cytomegalovirus gene UL144 escapes regulation by viral IE86. *Journal of virology* 82(9):4250-4256.
18. Tomann P, Paus R, Millar SE, Scheidereit C, & Schmidt-Ullrich R (2016) Lhx2 is a direct NF-kappaB target gene that promotes primary hair follicle placode down-growth. *Development* 143(9):1512-1522.
19. Burke SJ, et al. (2014) NF-kappaB and STAT1 control CXCL1 and CXCL2 gene transcription. *Am J Physiol Endocrinol Metab* 306(2):E131-149.
20. Li Y, Ohms SJ, Sun C, & Fan J (2013) NF-kappaB controls Il2 and Csf2 expression during T cell development and activation process. *Mol Biol Rep* 40(2):1685-1692.
21. Kenneth NS, Mudie S, & Rocha S (2010) IKK and NF-kappaB-mediated regulation of Claspin impacts on ATR checkpoint function. *EMBO J* 29(17):2966-2978.
22. Yamanishi E, Yoon K, Alberi L, Gaiano N, & Mizutani K (2015) NF-kappaB signaling regulates the generation of intermediate progenitors in the developing neocortex. *Genes Cells* 20(9):706-719.
23. Wamsley JJ, et al. (2015) Activin upregulation by NF-kappaB is required to maintain mesenchymal features of cancer stem-like cells in non-small cell lung cancer. *Cancer Res* 75(2):426-435.
24. Joo JH, et al. (2003) Involvement of NF-kappaB in the regulation of S100A6 gene expression in human hepatoblastoma cell line HepG2. *Biochem Biophys Res Commun* 307(2):274-280.
25. Hinz M, et al. (2002) Nuclear factor kappaB-dependent gene expression profiling of Hodgkin's disease tumor cells, pathogenetic significance, and link to constitutive signal transducer and activator of transcription 5a activity. *J Exp Med* 196(5):605-617.
26. Chen JM, et al. (2015) The involvement of nuclear factor-kappaB in the nuclear targeting and cyclin E1 upregulating activities of hepatoma upregulated protein. *Cell Signal* 27(1):26-36.
27. Espanol A, Dasso M, Cella M, Goren N, & Sales ME (2012) Muscarinic regulation of SCA-9 cell proliferation via nitric oxide synthases, arginases and cyclooxygenases. Role of the nuclear translocation factor-kappaB. *Eur J Pharmacol* 683(1-3):43-53.
28. Zhao J, Freeman GJ, Gray GS, Nadler LM, & Glimcher LH (1996) A cell type-specific enhancer in the human B7.1 gene regulated by NF-kappaB. *J Exp Med* 183(3):777-789.
29. Gao M, et al. (2008) NF-kappaB p50 promotes tumor cell invasion through negative regulation of invasion suppressor gene CRMP-1 in human lung adenocarcinoma cells. *Biochem Biophys Res Commun* 376(2):283-287.
30. Li-Weber M, Giaisi M, Baumann S, Palfi K, & Krammer PH (2004) NF-kappa B synergizes with NF-AT and NF-IL6 in activation of the IL-4 gene in T cells. *Eur J Immunol* 34(4):1111-1118.
31. Li F, et al. (2017) ADAMTS5 Deficiency in Calcified Aortic Valves Is Associated With Elevated Pro-Osteogenic Activity in Valvular Interstitial Cells. *Arterioscler Thromb Vasc Biol* 37(7):1339-1351.
32. Wu DD, et al. (2017) Extracellular signal-regulated kinase 8-mediated NF-kappaB activation increases sensitivity of human lung cancer cells to arsenic trioxide. *Oncotarget* 8(30):49144-49155.
33. Baig MS, et al. (2015) NOS1-derived nitric oxide promotes NF-kappaB transcriptional activity through inhibition of suppressor of cytokine signaling-1. *J Exp Med* 212(10):1725-1738.
34. Sur R, Lyte PA, & Southall MD (2008) Hsp27 regulates pro-inflammatory mediator release in keratinocytes by modulating NF-kappaB signaling. *J Invest Dermatol* 128(5):1116-1122.
35. Li Y & Luan C (2018) PLCE1 Promotes the Invasion and Migration of Esophageal Cancer Cells by Up-Regulating the PKCalpha/NF-kappaB Pathway. *Yonsei Med J* 59(10):1159-1165.

36. Ichikawa T, et al. (2013) 25-hydroxycholesterol promotes fibroblast-mediated tissue remodeling through NF-kappaB dependent pathway. *Experimental cell research* 319(8):1176-1186.
37. Mantovani F, et al. (1998) NF-kappaB mediated transcriptional activation is enhanced by the architectural factor HMGI-C. *Nucleic Acids Res* 26(6):1433-1439.
38. Chung S, et al. (2017) Identification of EGF-NF-kappaB-FOXC1 signaling axis in basal-like breast cancer. *Cell Commun Signal* 15(1):22.
39. Meylan E, Martinon F, Thome M, Gschwendt M, & Tschopp J (2002) RIP4 (DIK/PKK), a novel member of the RIP kinase family, activates NF-kappa B and is processed during apoptosis. *EMBO reports* 3(12):1201-1208.
40. Cheng ZY, et al. (2018) Parathyroid hormone promotes osteoblastic differentiation of endothelial cells via the extracellular signal-regulated protein kinase 1/2 and nuclear factor-kappaB signaling pathways. *Experimental and therapeutic medicine* 15(2):1754-1760.
41. Tang CH, Yang RS, Chen YF, & Fu WM (2007) Basic fibroblast growth factor stimulates fibronectin expression through phospholipase C gamma, protein kinase C alpha, c-Src, NF-kappaB, and p300 pathway in osteoblasts. *J Cell Physiol* 211(1):45-55.
42. Lee SU, et al. (2013) beta-Arrestin 2 mediates G protein-coupled receptor 43 signals to nuclear factor-kappaB. *Biol Pharm Bull* 36(11):1754-1759.
43. Duxbury MS & Whang EE (2007) RRM2 induces NF-kappaB-dependent MMP-9 activation and enhances cellular invasiveness. *Biochem Biophys Res Commun* 354(1):190-196.
44. Lee EJ, Park SS, Kim WJ, & Moon SK (2012) IL-5-induced migration via ERK1/2-mediated MMP-9 expression by inducing activation of NF-kappaB in HT1376 cells. *Oncology reports* 28(3):1084-1090.
45. Olavarria VH, Sepulcre MP, Figueroa JE, & Mulero V (2010) Prolactin-induced production of reactive oxygen species and IL-1beta in leukocytes from the bony fish gilthead seabream involves Jak/Stat and NF-kappaB signaling pathways. *J Immunol* 185(7):3873-3883.
46. Mukherjee N, Cardenas E, Bedolla R, & Ghosh R (2017) SETD6 regulates NF-kappaB signaling in urothelial cell survival: Implications for bladder cancer. *Oncotarget* 8(9):15114-15125.
